# Supplementary material
Source: PubMed Central journal article supplement (PMC8054884)
Supplement: ASN.2020050645SupplementaryData.pdf [file ASN.2020050645SupplementaryData.pdf]

## **Supplementary Appendix**

Supplement to:

**Steering of Transplant Immunosuppression by Virus-Specific T Cells  
(IVIST Trial)**

### **Table of Contents**

Table S1 Analysis of the Tvis-based and non-Tvis-based dose adjustments of immunosuppressants

Table S2 Results of protocol biopsy

Table S3 Summary of (serious) adverse events

Table S4 System organ classes of serious adverse events

| <b>Table S1. Dose adjustments of immunosuppressants</b>                                |                                                         |                                                             |                                                    |
|----------------------------------------------------------------------------------------|---------------------------------------------------------|-------------------------------------------------------------|----------------------------------------------------|
|                                                                                        | <b>Tvis-based<br/>(intervention<br/>group)<br/>n=31</b> | <b>non-Tvis-based<br/>(intervention<br/>group)<br/>n=31</b> | <b>non-Tvis-based<br/>(control group)<br/>n=33</b> |
| Number of dose adjustments totally (dose reduction; dose increase)                     | 128<br>(125; 3)                                         | 494<br>(236; 258)                                           | 573<br>(319; 254)                                  |
| Number of patients with dose adjustments totally (dose reduction; dose increase)       | 28<br>(28; 2)                                           | 31<br>(31; 30)                                              | 33<br>(33; 32)                                     |
| Median (range) of dose adjustments totally [dose reduction; dose increase]             | 4 (0-10)<br>[4 (0-10); 0 (0-2)]                         | 11 (4-51)<br>[6 (1-26); 6 (0-25)]                           | 14 (3-49)<br>[9 (1-24); 6 (0-25)]                  |
| Number of dose adjustments of everolimus (dose reduction; dose increase)               | 74<br>(73; 1)                                           | 310<br>(136; 174)                                           | 340<br>(190; 150)                                  |
| Number of patients with dose adjustments of everolimus (dose reduction; dose increase) | 26<br>(25; 1)                                           | 31<br>(29; 28)                                              | 33<br>(32; 31)                                     |
| Median (range) of dose adjustments of everolimus [dose reduction; dose increase]       | 2 (0-8)<br>[2 (0-8); 0 (0-1)]                           | 8 (1-25)<br>[5 (0-14); 4 (0-12)]                            | 9 (1-27)<br>[6 (0-14); 4 (0-13)]                   |
| Number of dose adjustments of CsA (dose reduction; dose increase)                      | 54<br>(52; 2)                                           | 184<br>(100; 84)                                            | 233<br>(129; 104)                                  |
| Number of patients with dose adjustments of CsA (dose reduction; dose increase)        | 25<br>(25; 2)                                           | 29<br>(24; 27)                                              | 30<br>(30; 26)                                     |
| Median (range) of dose adjustments of CsA [dose reduction; dose increase]              | 2 (0-5)<br>[2 (0-5); 0 (0-1)]                           | 4 (0-26)<br>[2 (0-13); 2 (0-13)]                            | 5 (0-31)<br>[2 (0-17); 3 (0-14)]                   |

| <b>Table S2. Results of protocol biopsy</b> |                                |                           |                         |
|---------------------------------------------|--------------------------------|---------------------------|-------------------------|
|                                             | <b>Intervention<br/>(N=24)</b> | <b>Control<br/>(N=26)</b> | <b>Total<br/>(N=50)</b> |
| No rejection                                | 11                             | 9                         | 20                      |
| Borderline                                  | 8                              | 11                        | 19                      |
| Banff type IA                               | 4                              | 3                         | 7                       |
| Banff type IB                               | 0                              | 2                         | 2                       |
| Banff type IIA                              | 1                              | 1                         | 2                       |
| Banff type IIB                              | 0                              | 0                         | 0                       |
| Banff type III                              | 0                              | 0                         | 0                       |

Protocol biopsy (6 months after transplantation) was performed on 51 patients. For one patient in the control group, the sample material was insufficient for histological assessment.

**Table S3. Summary of (serious) adverse events**

|                                                                                      | <b>Intervention<br/>(N=31)</b> | <b>Control<br/>(N=33)</b> | <b>Total<br/>(N=64)</b> | <b>p-value</b> |
|--------------------------------------------------------------------------------------|--------------------------------|---------------------------|-------------------------|----------------|
| <b>Adverse events (AEs)</b>                                                          |                                |                           |                         |                |
| Total number of AEs                                                                  | 947                            | 967                       | 1914                    |                |
| Number of patients with $\geq 1$ AE                                                  | 31<br>(100.0%)                 | 33<br>(100.0%)            | 64<br>(100.0%)          |                |
| Number of patients with $\geq 1$ AE with suspected relationship to study medication† | 26<br>(83.9%)                  | 31<br>(93.9%)             | 57<br>(89.1%)           | 0.25           |
| <b>Serious adverse events (SAEs)</b>                                                 |                                |                           |                         |                |
| Total Number of SAEs                                                                 | 168                            | 157                       | 325                     |                |
| Number of patients with $\geq 1$ SAE*                                                | 25<br>(80.6%)                  | 28<br>(84.8%)             | 53<br>(82.8%)           | 0.66           |
| Number of patient with $\geq 1$ SAE with suspected relationship to study medication* | 17<br>(54.8%)                  | 18<br>(54.5%)             | 35<br>(54.7%)           | 0.98           |
| SAE with outcome death†                                                              | 0<br>(0.0%)                    | 1<br>(3.0%)               | 1<br>(1.6%)             | 1.00           |

AE – adverse event

SAE – serious adverse event

Displayed are absolute and relative frequencies. p-values for the comparison between intervention and control group are derived either from two-sided chi-squared test (\*) or from two-sided Fisher's exact test (†).

**Table S4. System organ classes of serious adverse events**

|                                        | <b>Intervention<br/>(N=31)</b> | <b>Control<br/>(N=33)</b> | <b>Total<br/>(N=64)</b> |
|----------------------------------------|--------------------------------|---------------------------|-------------------------|
| Blood and lymphatic system dis         | 2 (6.5%)                       | 3 (9.1%)                  | 5 (7.8%)                |
| Cardiac dis                            | 0 (0.0%)                       | 2 (6.1%)                  | 2 (3.1%)                |
| Congenital, familial and genetic dis   | 0 (0.0%)                       | 1 (3.0%)                  | 1 (1.6%)                |
| Endocrine dis                          | 1 (3.2%)                       | 0 (0.0%)                  | 1 (1.6%)                |
| Eye dis                                | 0 (0.0%)                       | 1 (3.0%)                  | 1 (1.6%)                |
| Gastrointestinal dis                   | 8 (25.8%)                      | 5 (15.2%)                 | 13 (20.3%)              |
| General dis and asd                    | 8 (25.8%)                      | 13 (39.4%)                | 21 (32.8%)              |
| Immune dis                             | 8 (25.8%)                      | 14 (42.4%)                | 22 (34.4%)              |
| Infections and infestations            | 20 (64.5%)                     | 17 (51.5%)                | 37 (57.8%)              |
| Injury, poisoning and pc               | 1 (3.2%)                       | 5 (15.2%)                 | 6 (9.4%)                |
| Investigations                         | 11 (35.5%)                     | 8 (24.2%)                 | 19 (29.7%)              |
| Metabolism and nutrition dis           | 11 (35.5%)                     | 8 (24.2%)                 | 19 (29.7%)              |
| Nervous system dis                     | 1 (3.2%)                       | 1 (3.0%)                  | 2 (3.1%)                |
| Product issues                         | 0 (0.0%)                       | 1 (3.0%)                  | 1 (1.6%)                |
| Renal and urinary dis                  | 5 (16.1%)                      | 2 (6.1%)                  | 7 (10.9%)               |
| Respiratory, thoracic, mediastinal dis | 2 (6.5%)                       | 3 (9.1%)                  | 5 (7.8%)                |
| Skin and subcutaneous tissue dis       | 1 (3.2%)                       | 0 (0.0%)                  | 1 (1.6%)                |
| Vascular dis                           | 0 (0.0%)                       | 2 (6.1%)                  | 2 (3.1%)                |

asd - administration site conditions

dis - disorders

pc - procedural complications
